# Supplementary material for: Interventions to Improve Hydration in Older Adults: A Systematic Review and Meta-Analysis
Source: MDPI journal article supplement (doi:10.3390/nu13103640), 2021-10-18
Supplement: s1 [file s1]

Supplementary Table S1. Search terms (CINAHL)

|                           |                                                                                                                                                                                                                                                                                                                                                    |
|---------------------------|----------------------------------------------------------------------------------------------------------------------------------------------------------------------------------------------------------------------------------------------------------------------------------------------------------------------------------------------------|
| Population search terms   | (MH "Aged") OR (MH "Aged, 80 and over") OR (MH "Geriatrics") OR (old or older) N5 (resident* or age* or adult* or person* or people or wom?n or female* or m?n or male* or patient*) OR elder*OR geriatr* OR "nursing home patients" OR "aged hospitalized" OR alzhem* OR dement* OR(MH "Frail Elderly") OR cognitive n3 (impair* OR dysfunction*) |
| Intervention search terms | (MH "Fluid Therapy") OR (MH "Beverages") ORdrink* OR fluid* N3 therap* OR ((fluid* or water*or liquid*) N5 (intake* or monitor* or replac* or replenish*))                                                                                                                                                                                         |
| Outcome search terms      | (MH "Dehydration") OR (MH "Hypernatremia")OR dehydrat* OR dehydrat* OR hydrat* OR rehydrat* OR hypovolemia OR (MH "Hypovolemia")                                                                                                                                                                                                                   |

Supplementary Table S2: Risk of Bias Assessment of Included Studies (n=19)

| Author                  | Research question | Selection criteria | Comparable groups | Follow-up | Blinding | Intervention | Outcomes | Statistics | Conclusion | Funding | Overall rating |
|-------------------------|-------------------|--------------------|-------------------|-----------|----------|--------------|----------|------------|------------|---------|----------------|
| Allen et al. 2013       | Y                 | Y                  | Y                 | Y         | Y        | Y            | Y        | Y          | Y          | Y       | Positive       |
| Bak et al. 2018         | Y                 | UC                 | UC                | UC        | N        | UC           | UC       | N          | Y          | Y       | Neutral        |
| Dunne et al. 2004       | Y                 | UC                 | NA                | UC        | N        | N            | UC       | UC         | N          | Y       | Neutral        |
| Holzappel et al. 1996   | Y                 | Y                  | UC                | UC        | N        | Y            | UC       | UC         | Y          | Y       | Neutral        |
| Howard et al. 2018      | Y                 | Y                  | Y                 | NA        | NA       | Y            | Y        | UC         | Y          | UC      | Positive       |
| Karagiannis et al. 2011 | Y                 | Y                  | Y                 | UC        | Y        | Y            | Y        | N          | Y          | Y       | Positive       |
| Kenkmann et al. 2010    | Y                 | UC                 | UC                | Y         | UC       | UC           | N        | Y          | Y          | N       | Neutral        |
| Lin 2013                | Y                 | UC                 | Y                 | Y         | UC       | Y            | Y        | UC         | Y          | Y       | Positive       |
| McCormick et al. 2006   | Y                 | UC                 | Y                 | Y         | UC       | UC           | UC       | N          | N          | N       | Neutral        |
| Mentes & Culp 2003      | Y                 | Y                  | Y                 | N         | Y        | UC           | Y        | N          | Y          | Y       | Positive       |
| Murray et al. 2016      | Y                 | Y                  | Y                 | Y         | Y        | Y            | Y        | Y          | Y          | Y       | Positive       |
| Robinson & Rosher 2002  | Y                 | UC                 | NA                | UC        | UC       | UC           | UC       | N          | N          | UC      | Neutral        |
| Schanelle et al. 2010   | Y                 | Y                  | Y                 | Y         | Y        | UC           | Y        | Y          | Y          | Y       | Positive       |
| Simmons et al. 2001     | Y                 | Y                  | UC                | N         | Y        | Y            | Y        | Y          | Y          | UC      | Positive       |

Legend: Y = yes, N = no, UC = unclear, NA = not applicable
